# Supplementary material for: Lead and zinc dust depositions from ore trains characterised using lead isotopic compositions
Source: Royal Society of Chemistry journal article supplement (doi:10.1039/c4em00572d), 2015-01-01

## Supplementary Information

### **Lead and zinc dust depositions from ore trains characterised using lead isotopic compositions**

Authors: Louise J. Kristensen, Mark P. Taylor, Anthony L. Morrison

**Supplementary Table S1:** Soil copper, zinc and lead concentrations and lead isotopic compositions.

**Supplementary Figure S1:** Soil lead and zinc concentration profiles across Broken Hill train line transect at Broken Hill.

**Supplementary Figure S2:** Soil lead and zinc concentration profiles across Broken Hill train line transect at The Gorge.

**Supplementary Figure S3:** Soil lead isotopic compositions at either side of the rail line at Silverton, benchmarked against Broken Hill ore.

**Supplementary Figure S4:** Soil lead isotopic compositions at either side of the rail line at Broken Hill, benchmarked against Broken Hill ore.

**Supplementary Figure S5:** Soil lead isotopic compositions at either side of the rail line at The Gorge, benchmarked against Broken Hill ore.

**Supplementary Figure S6:** Photograph of a train moving ballast material ~ 50 mm in size, travelling to the east of Broken Hill. Note the plumes of dust coming from the ballast on the uncovered wagons. (Photo taken by M.P. Taylor 2009)

**Supplementary Table S1:** Soil copper, zinc and lead concentrations and lead isotopic compositions.

| Train line    | Direction from tracks | Distance to track [m] | Soil depth [cm] | Cu      | Zn   | Pb   | <sup>206</sup> Pb/ <sup>207</sup> Pb | <sup>208</sup> Pb/ <sup>207</sup> Pb | <sup>206</sup> Pb/ <sup>204</sup> Pb |
|---------------|-----------------------|-----------------------|-----------------|---------|------|------|--------------------------------------|--------------------------------------|--------------------------------------|
|               |                       |                       |                 | [mg/kg] |      |      |                                      |                                      |                                      |
| Silverton     | North                 | 11                    | 0-2             | 18      | 1200 | 695  | 1.044                                | 2.321                                | 16.10                                |
|               |                       |                       | 2-10            | 24      | 780  | 380  |                                      |                                      |                                      |
|               |                       |                       | 40-50           | 25      | 110  | 39   |                                      |                                      |                                      |
|               |                       | 58                    | 0-2             | 18      | 150  | 61   | 1.065                                | 2.347                                | 16.42                                |
|               |                       |                       | 2-10            | 22      | 88   | 25   |                                      |                                      |                                      |
|               |                       |                       | 40-50           | 25      | 59   | 10   |                                      |                                      |                                      |
|               |                       | 101                   | 0-2             | 14      | 130  | 48   | 1.072                                | 2.347                                | 16.58                                |
|               |                       |                       | 2-10            | 19      | 72   | 23   |                                      |                                      |                                      |
|               |                       |                       | 40-50           | 25      | 60   | 11   | 1.180                                | 2.454                                | 18.37                                |
|               | South                 | 11                    | 0-2             | 14      | 270  | 140  | 1.050                                | 2.334                                | 16.18                                |
|               |                       |                       | 2-10            | 20      | 130  | 46   |                                      |                                      |                                      |
|               |                       |                       | 40-50           | 26      | 74   | 13   |                                      |                                      |                                      |
|               |                       | 53                    | 0-2             | 16      | 130  | 56   | 1.070                                | 2.347                                | 16.46                                |
|               |                       |                       | 2-10            | 22      | 81   | 19   |                                      |                                      |                                      |
|               |                       |                       | 40-50           | 24      | 51   | 7.4  |                                      |                                      |                                      |
|               |                       | 101                   | 0-2             | 15      | 96   | 40   | 1.077                                | 2.353                                | 16.68                                |
|               |                       |                       | 2-10            | 20      | 59   | 12   |                                      |                                      |                                      |
|               |                       |                       | 40-50           | 19      | 50   | 7    | 1.209                                | 2.476                                | 18.82                                |
| Triple Chance | North                 | 1.5                   | 0-2             | 30      | 355  | 65   | 1.081                                | 2.366                                | 16.67                                |
|               |                       |                       | 2-10            | 32      | 290  | 46   |                                      |                                      |                                      |
|               |                       |                       | 10-20           | 23      | 320  | 50   |                                      |                                      |                                      |
|               |                       |                       | 20-30           | 19      | 74   | 12.5 |                                      |                                      |                                      |
|               |                       |                       | 30-40           | 20      | 79   | 12   |                                      |                                      |                                      |
|               |                       |                       | 40-50           | 17      | 74   | 10   |                                      |                                      |                                      |
|               |                       | 60                    | 0-2             | 14      | 270  | 38   | 1.073                                | 2.353                                | 16.62                                |
|               |                       |                       | 2-10            | 15      | 75   | 13   |                                      |                                      |                                      |
|               |                       |                       | 10-20           | 14      | 52   | 9.1  |                                      |                                      |                                      |
|               |                       |                       | 20-30           | 15      | 64   | 12   |                                      |                                      |                                      |
|               |                       |                       | 30-40           | 18      | 75   | 12   |                                      |                                      |                                      |
|               |                       |                       | 40-50           | 19      | 81   | 12   |                                      |                                      |                                      |
|               |                       | 120                   | 0-2             | 13      | 130  | 25.8 | 1.096                                | 2.394                                | 16.97                                |
|               |                       |                       | 2-10            | 15      | 65   | 11   |                                      |                                      |                                      |
|               |                       |                       | 10-20           | 17      | 67   | 12   |                                      |                                      |                                      |
|               |                       |                       | 20-30           | 21      | 78   | 14   |                                      |                                      |                                      |
|               |                       |                       | 30-40           | 21      | 71   | 12   |                                      |                                      |                                      |
|               |                       |                       | 40-50           | 21      | 61.5 | 10   | 1.190                                | 2.484                                | 18.54                                |
|               | South                 | 4                     | 0-2             | 32      | 2230 | 325  | 1.051                                | 2.328                                | 16.21                                |
|               |                       |                       | 2-10            | 28      | 94   | 14   |                                      |                                      |                                      |
|               |                       |                       | 10-20           | 30      | 82   | 11   |                                      |                                      |                                      |
|               |                       |                       | 20-30           | 26      | 72   | 10   |                                      |                                      |                                      |
|               |                       |                       | 30-40           | 27      | 73   | 11   |                                      |                                      |                                      |
|               |                       |                       | 40-50           | 29      | 85   | 12   |                                      |                                      |                                      |
|               |                       | 70                    | 0-2             | 12      | 160  | 19.5 | 1.089                                | 2.376                                | 16.90                                |
|               |                       |                       | 2-10            | 16      | 270  | 33   |                                      |                                      |                                      |
|               |                       |                       | 10-20           | 19      | 59   | 12   |                                      |                                      |                                      |
|               |                       |                       | 20-30           | 24      | 65   | 11   |                                      |                                      |                                      |
|               |                       |                       | 30-40           | 25      | 66   | 11   |                                      |                                      |                                      |
|               |                       |                       | 40-50           | 25      | 72   | 11   |                                      |                                      |                                      |
|               |                       | 125                   | 0-2             | 15      | 84   | 12.5 | 1.126                                | 2.416                                | 17.48                                |
|               |                       |                       | 2-10            | 15      | 110  | 13   |                                      |                                      |                                      |
|               |                       |                       | 10-20           | 15      | 40   | 7.3  |                                      |                                      |                                      |

|                                     |          |     |       |       |      |     |       |       |       |       |
|-------------------------------------|----------|-----|-------|-------|------|-----|-------|-------|-------|-------|
|                                     |          |     |       | 20-30 | 22   | 57  | 9.5   |       |       |       |
|                                     |          |     |       | 30-40 | 25   | 60  | 10.8  |       |       |       |
|                                     |          |     |       | 40-50 | 26   | 54  | 9.7   | 1.200 | 2.474 | 18.79 |
| Broken Hill to Sydney (Broken Hill) | North    | 22  | 0-2   | 19    | 660  | 330 | 1.051 | 2.330 | 16.22 |       |
|                                     |          |     | 2-10  | 12    | 140  | 110 |       |       |       |       |
|                                     |          |     | 40-50 | 21    | 45   | 42  |       |       |       |       |
|                                     |          | 61  | 0-2   | 20    | 500  | 290 | 1.042 | 2.321 | 16.06 |       |
|                                     |          |     | 2-10  | 20    | 63   | 26  |       |       |       |       |
|                                     |          |     | 40-50 | 26    | 67   | 9   |       |       |       |       |
|                                     |          | 100 | 0-2   | 17    | 430  | 310 | 1.044 | 2.326 | 16.10 |       |
|                                     |          |     | 2-10  | 14    | 43   | 29  |       |       |       |       |
|                                     |          |     | 40-50 | 24    | 28   | 12  | 1.094 | 2.388 | 16.87 |       |
|                                     | South    | 23  | 0-2   | 39    | 1300 | 530 | 1.049 | 2.324 | 16.16 |       |
|                                     |          |     | 2-10  | 39    | 280  | 160 |       |       |       |       |
|                                     |          |     | 40-50 | 66    | 61   | 27  |       |       |       |       |
|                                     |          | 55  | 0-2   | 27    | 740  | 380 | 1.046 | 2.322 | 16.13 |       |
|                                     |          |     | 2-10  | 23    | 80   | 37  |       |       |       |       |
|                                     |          |     | 40-50 | 28    | 45   | 10  |       |       |       |       |
|                                     |          | 112 | 0-2   | 17    | 490  | 290 | 1.043 | 2.323 | 16.07 |       |
|                                     |          |     | 2-10  | 21    | 96   | 53  |       |       |       |       |
|                                     |          |     | 40-50 | 18    | 29   | 11  | 1.115 | 2.401 | 17.22 |       |
| Broken Hill to Sydney (Gorge)       | North    | 10  | 0-2   | 26    | 190  | 61  | 1.085 | 2.363 | 16.75 |       |
|                                     |          |     | 2-10  | 31    | 190  | 49  |       |       |       |       |
|                                     |          |     | 10-20 | 26    | 170  | 62  |       |       |       |       |
|                                     |          |     | 40-50 | 28    | 65   | 24  |       |       |       |       |
|                                     |          | 51  | 0-2   | 22    | 130  | 57  | 1.083 | 2.361 | 16.78 |       |
|                                     |          |     | 2-10  | 28    | 74   | 26  |       |       |       |       |
|                                     |          |     | 10-20 | 31    | 60   | 21  |       |       |       |       |
|                                     |          |     | 40-50 | 28    | 59   | 21  |       |       |       |       |
|                                     |          | 100 | 0-2   | 24    | 71   | 28  | 1.143 | 2.421 | 17.73 |       |
|                                     |          |     | 2-10  | 26    | 59   | 22  |       |       |       |       |
|                                     |          |     | 10-20 | 27    | 57   | 19  |       |       |       |       |
|                                     |          |     | 40-50 | 20    | 39   | 13  | 1.199 | 2.466 | 18.76 |       |
|                                     |          | 154 | 0-2   | 8.3   | 35   | 15  |       |       |       |       |
|                                     |          |     | 2-10  | 8.7   | 29   | 12  |       |       |       |       |
|                                     |          |     | 10-20 | 9.3   | 28   | 12  |       |       |       |       |
|                                     |          |     | 40-50 | 8.1   | 19   | 7.3 |       |       |       |       |
|                                     | South    | 27  | 0-2   | 11    | 33   | 110 | 1.088 | 2.372 | 16.86 |       |
|                                     |          |     | 2-10  | 12    | 27   | 65  |       |       |       |       |
|                                     |          |     | 10-20 | 28    | 25   | 67  |       |       |       |       |
|                                     |          |     | 40-50 | 32    | 16   | 50  |       |       |       |       |
|                                     |          | 33  | 0-2   | 11    | 25   | 72  | 1.105 | 2.393 | 17.12 |       |
|                                     |          | 50  | 0-2   | 23    | 81   | 27  | 1.140 | 2.414 | 17.73 |       |
|                                     |          |     | 2-10  | 13    | 51   | 18  |       |       |       |       |
|                                     |          |     | 10-20 | 13    | 40   | 16  |       |       |       |       |
|                                     |          |     | 40-50 | 25    | 54   | 20  |       |       |       |       |
|                                     |          | 100 | 0-2   | 8.4   | 40   | 16  | 1.134 | 2.425 | 17.70 |       |
|                                     |          |     | 2-10  | 7.7   | 35   | 15  |       |       |       |       |
|                                     |          |     | 10-20 | 6.4   | 23   | 11  |       |       |       |       |
|                                     |          |     | 40-50 | 8.3   | 19   | 7.6 | 1.214 | 2.504 | 18.80 |       |
|                                     |          | 143 | 0-2   | 8     | 38   | 16  |       |       |       |       |
|                                     |          |     | 2-10  | 6.9   | 26   | 10  |       |       |       |       |
|                                     |          |     | 10-20 | 6.9   | 28   | 10  |       |       |       |       |
|                                     |          |     | 40-50 | 7.3   | 21   | 10  |       |       |       |       |
| Broken Hill Ore                     | Sample 1 |     |       |       |      |     | 1.040 | 2.323 | 15.99 |       |
|                                     | Sample 2 |     |       |       |      |     | 1.041 | 2.319 | 16.05 |       |

**Supplementary Figure S1:** Soil lead and zinc concentration profiles across Broken Hill train line transect at Broken Hill.

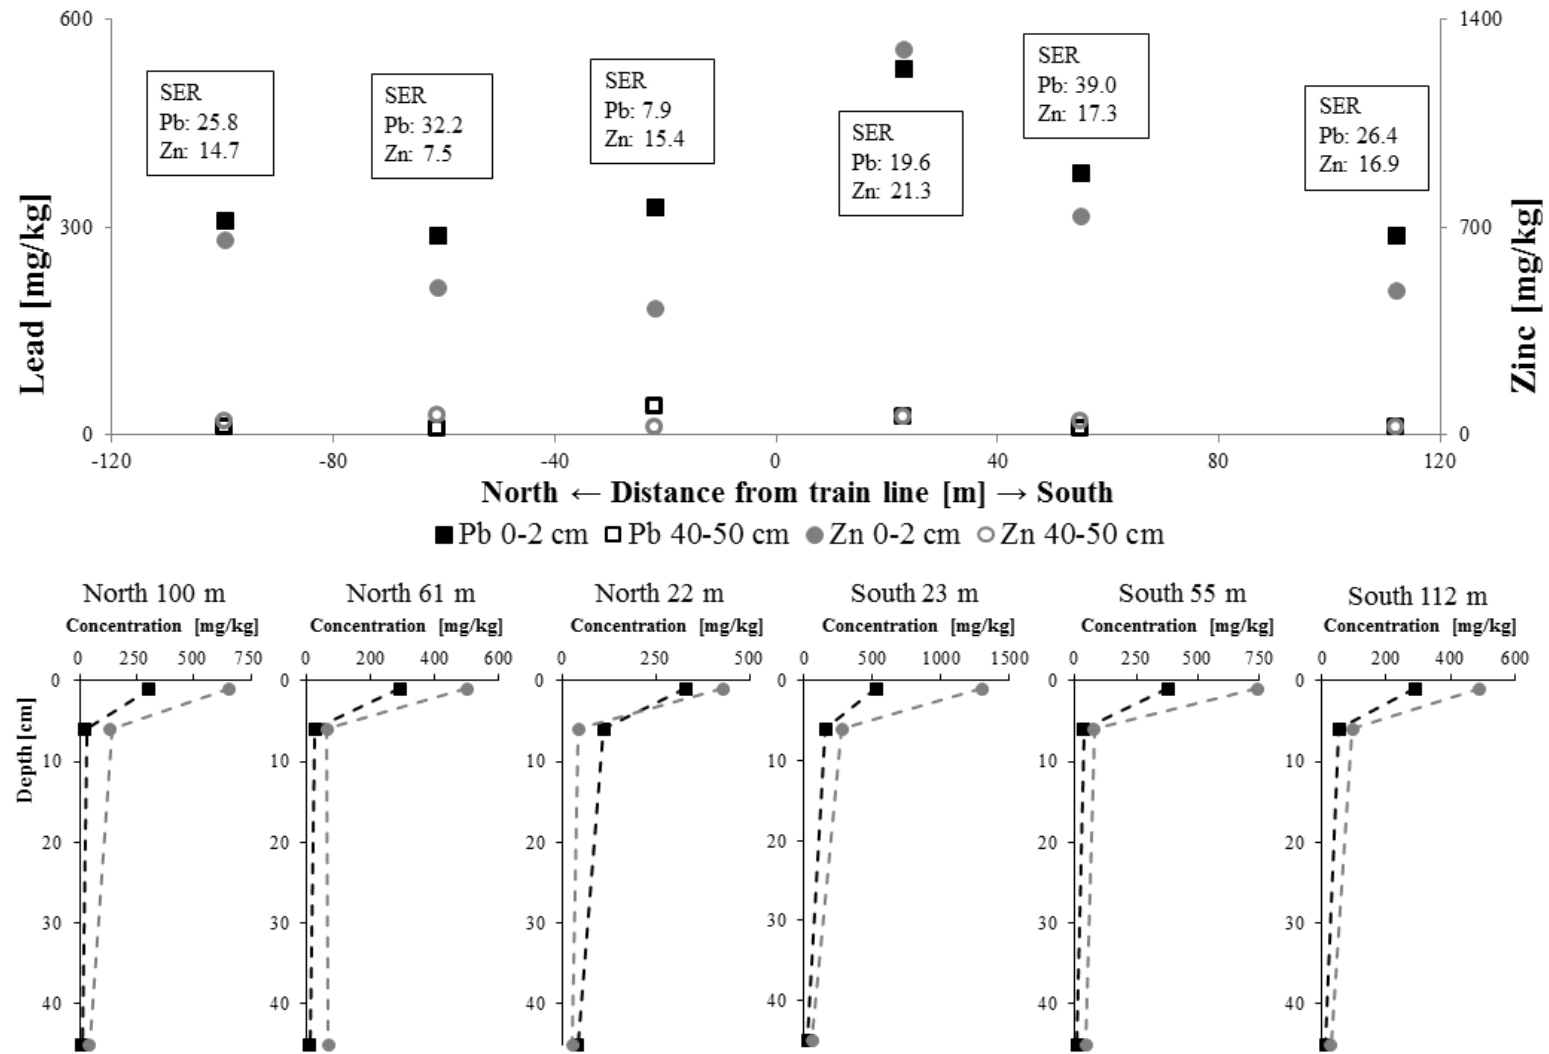

**Supplementary Figure S2:** Soil lead and zinc concentration profiles across Broken Hill train line transect at The Gorge.

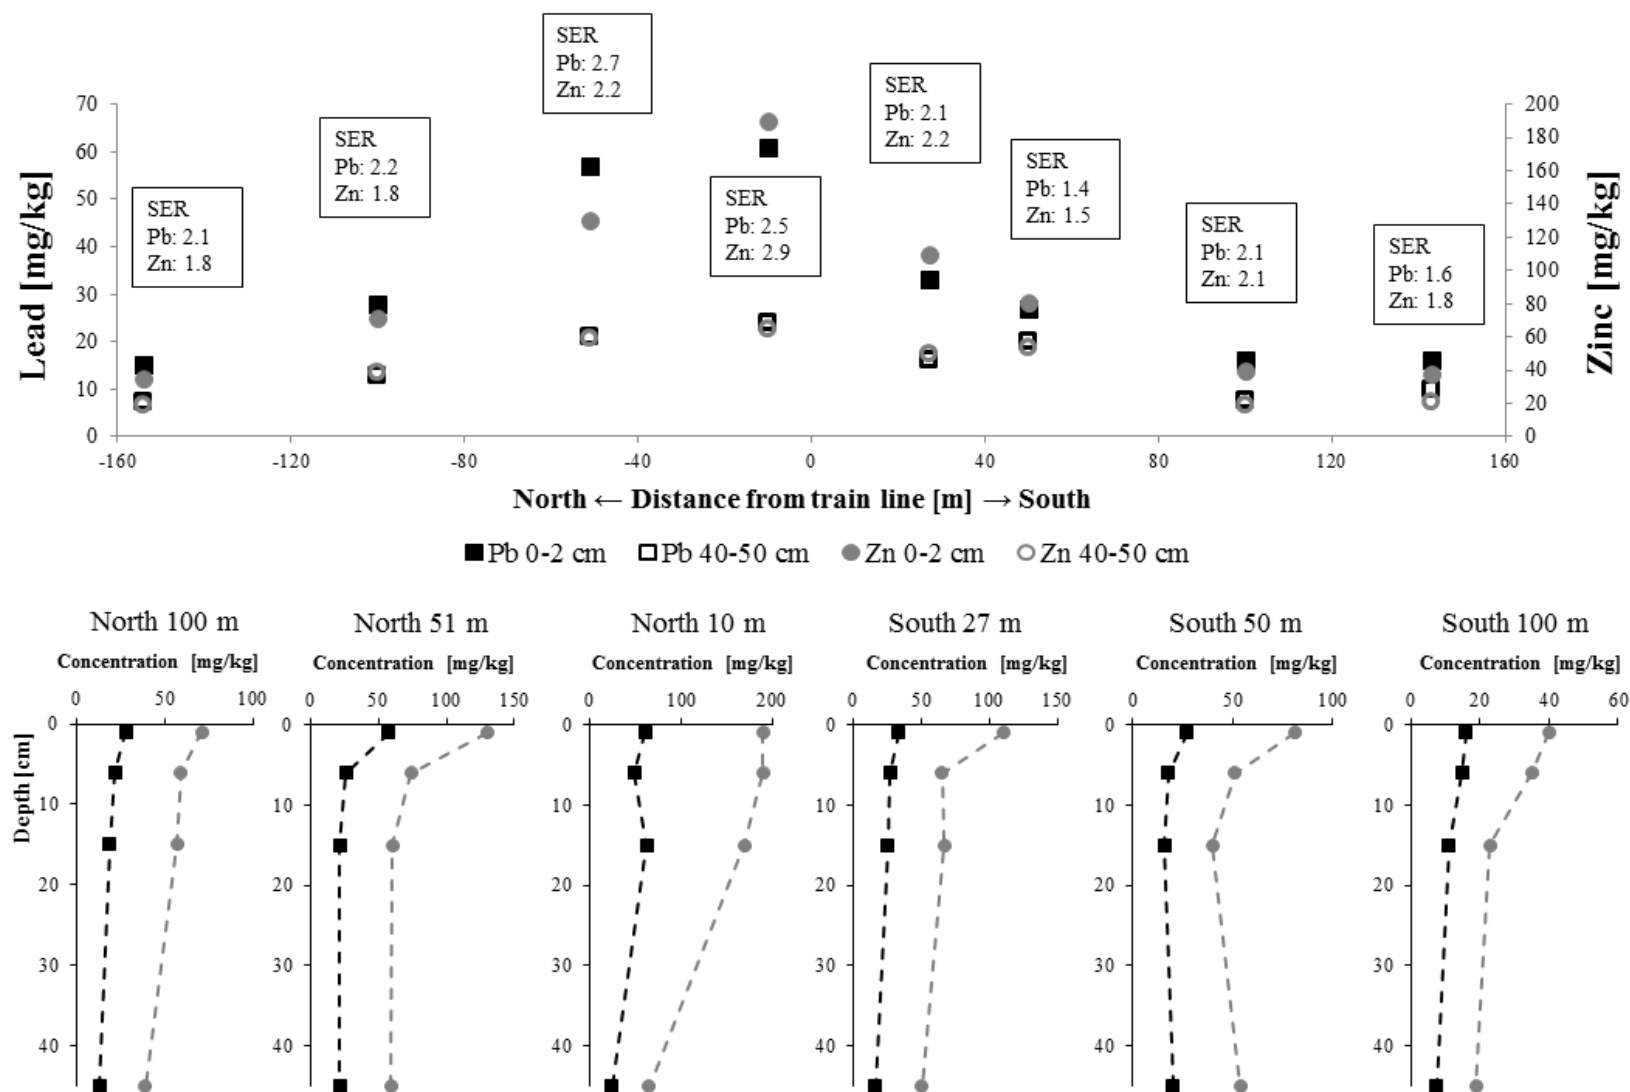

**Supplementary Figure S3:** Soil lead isotopic compositions at either side of the rail line at Silverton, benchmarked against Broken Hill ore.

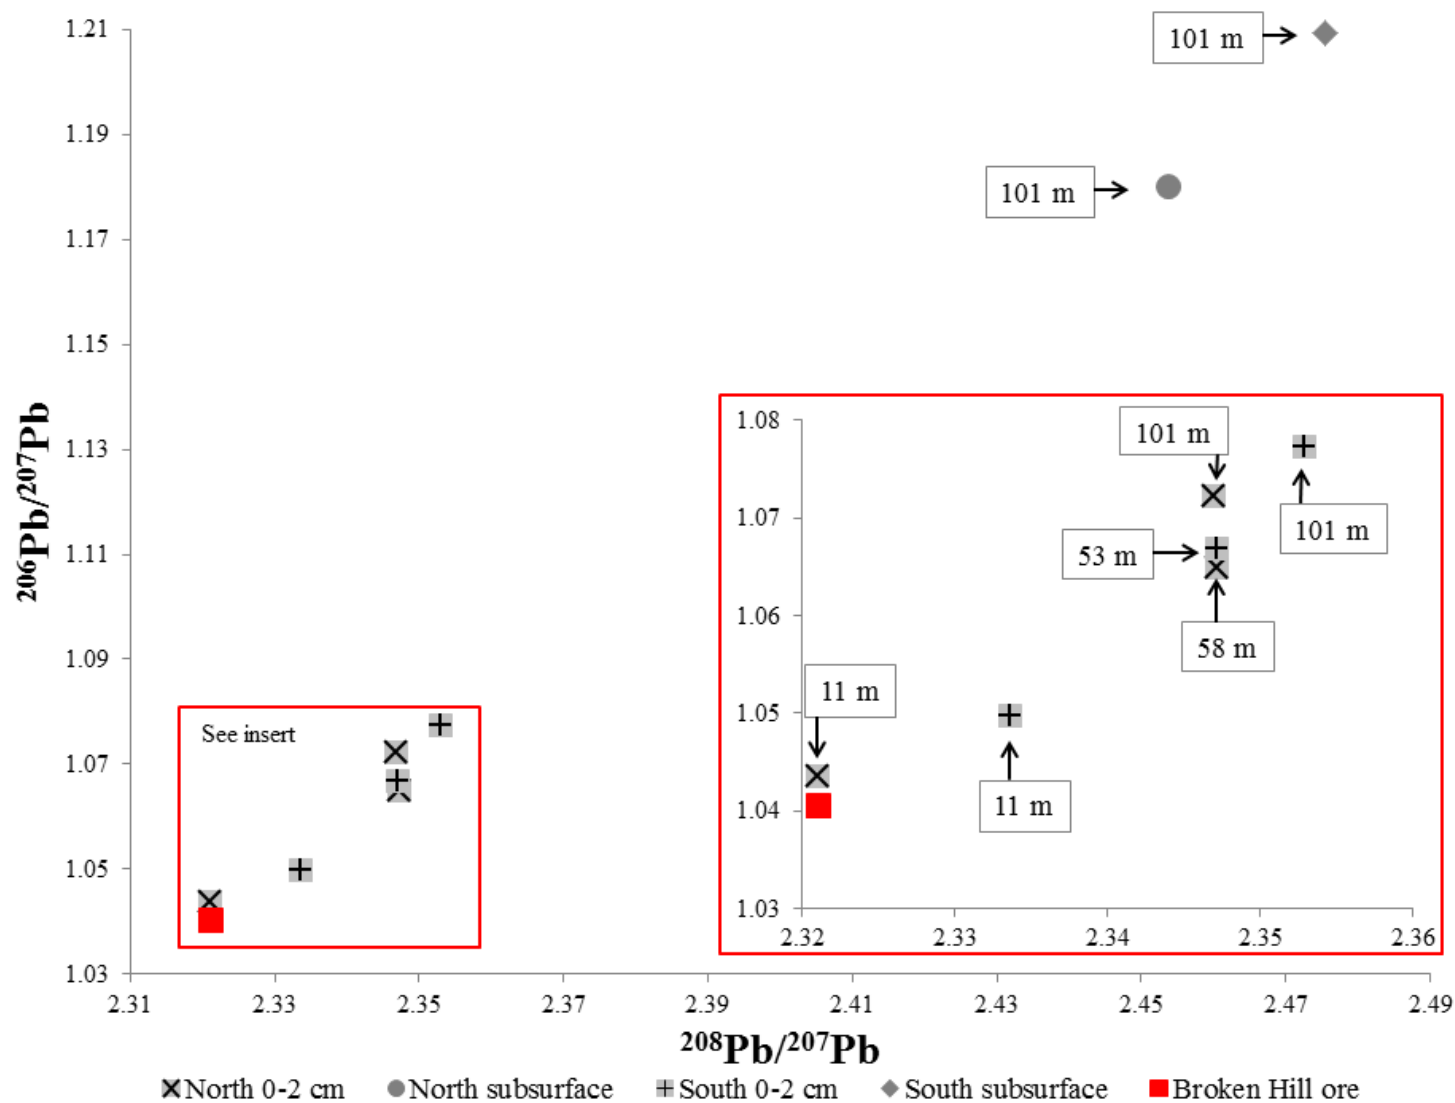

**Supplementary Figure S4:** Soil lead isotopic compositions at either side of the rail line at Broken Hill, benchmarked against Broken Hill ore.

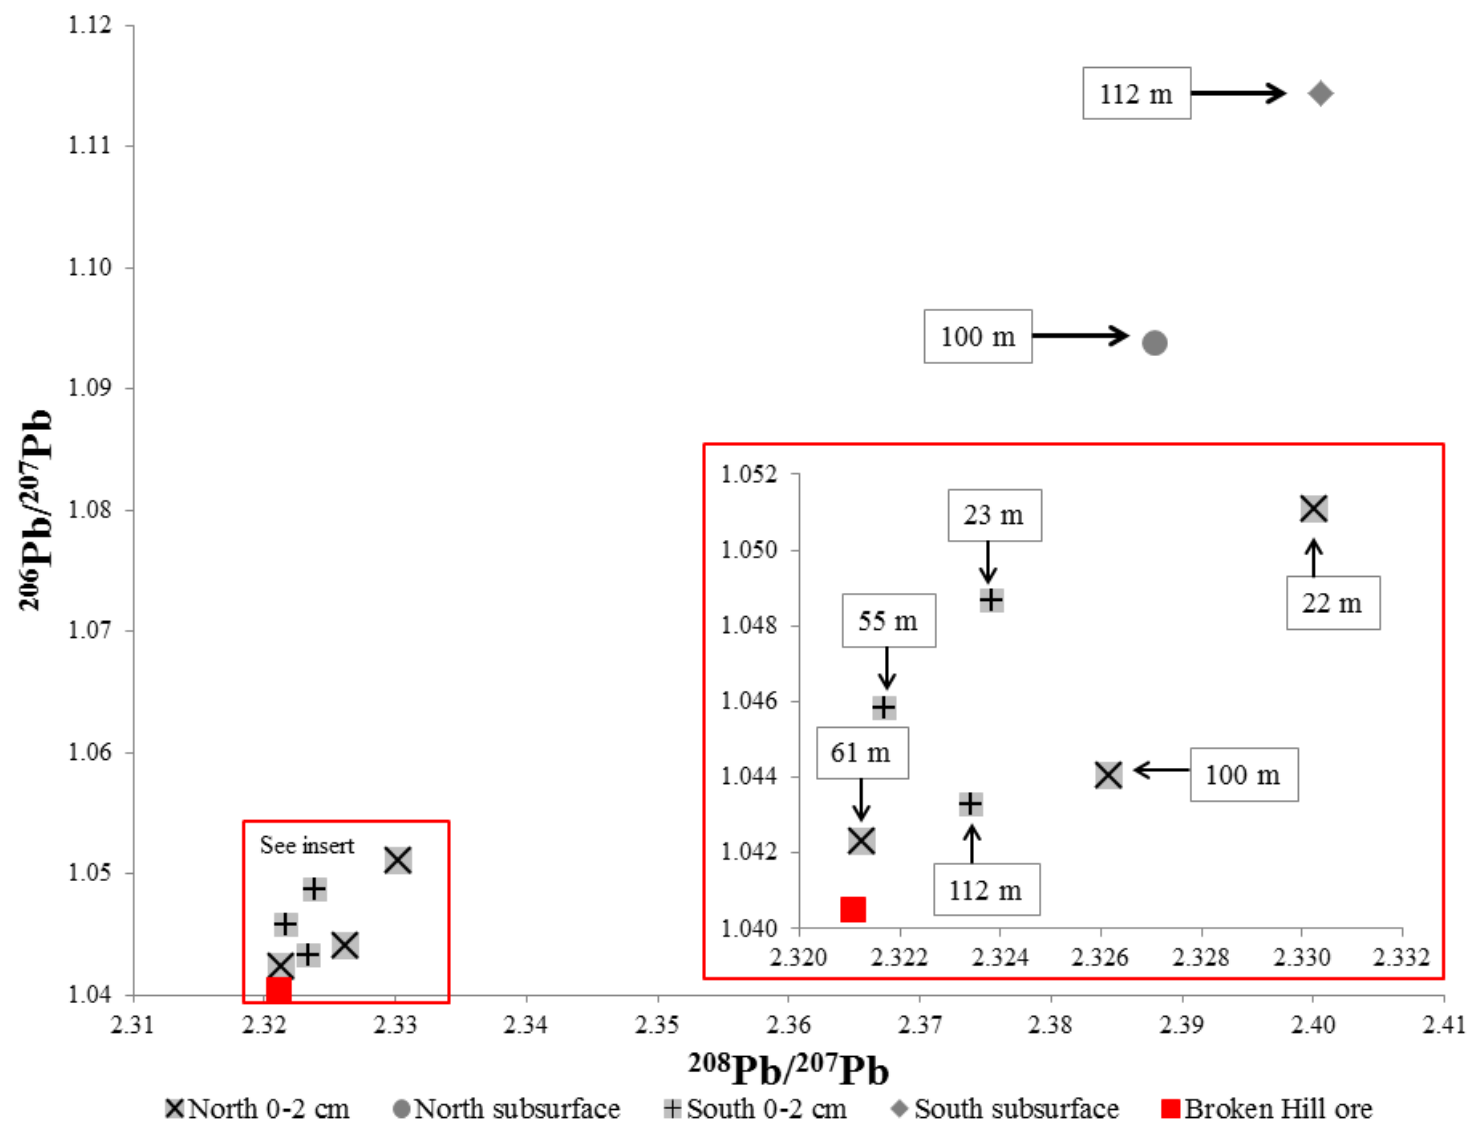

**Supplementary Figure S5:** Soil lead isotopic compositions at either side of the rail line at The Gorge, benchmarked against Broken Hill ore.

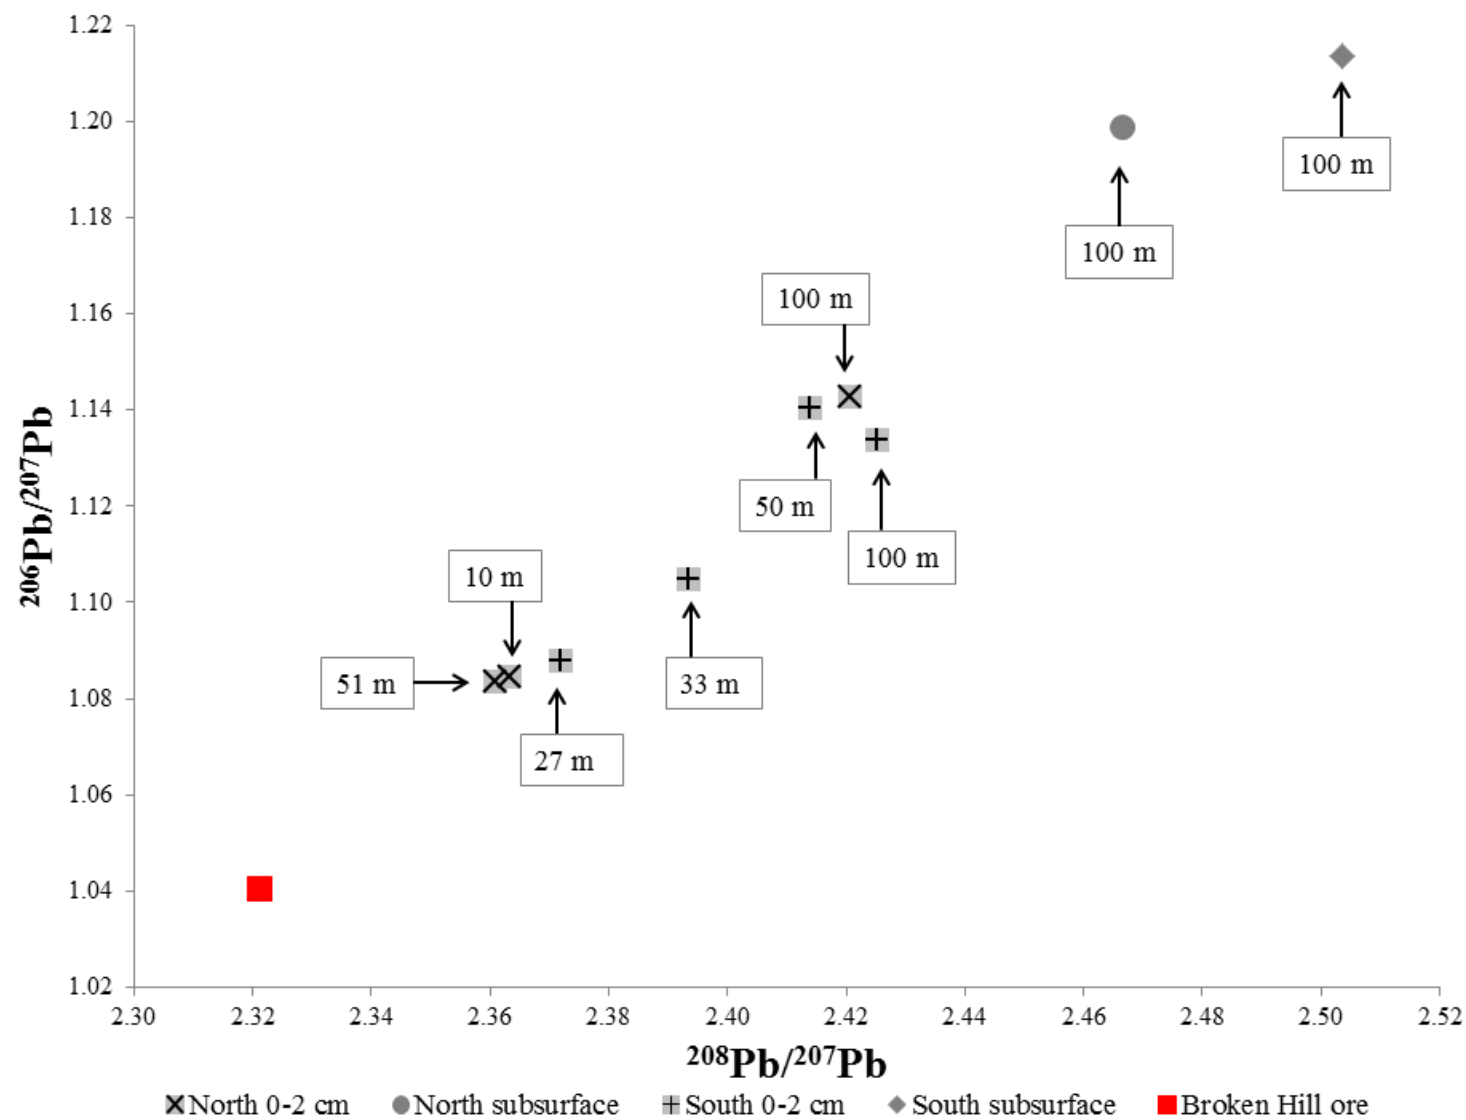



**Supplementary Figure S6:** Photograph of a train moving ballast material ~ 50 mm in size, travelling to the east of Broken Hill. Note the plumes of dust coming from the ballast on the uncovered wagons. (Photo taken by M.P. Taylor 2009)

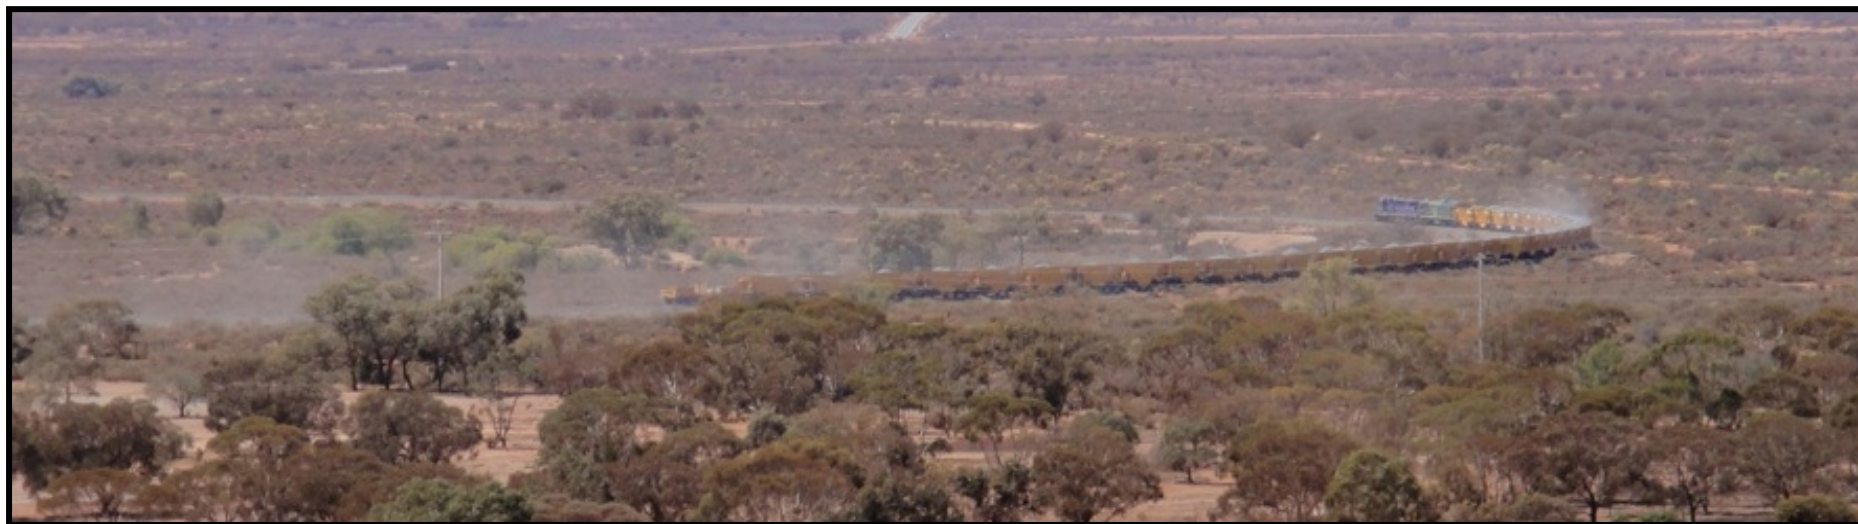

Supplement: c4em00572d1.pdf [file c4em00572d1.pdf]
